# Supplementary material for: Chemical composition characterization of poly(vinylidene fluoride-chlorotrifluoroethylene)-based copolymers with F–H decoupled 1H NMR
Source: Royal Society of Chemistry journal article supplement (doi:10.1039/c6ra11757k), 2016-01-01
Supplement: c6ra11757k1.pdf [file c6ra11757k1.pdf]

# Electronic Supplementary Information

## Chemical Composition Characterization of Poly(vinylidene fluoride-chlorotrifluoroethylene) Based Copolymers with F-H Decoupled $^1\text{H}$ NMR

Honghong Gong, Xiaomeng Zhang, Yanan Zhang, Aqun Zheng, Shaobo Tan, Zhicheng Zhang\*

Department of Applied Chemistry, MOE Key Laboratory for Nonequilibrium Synthesis and Modulation of Condensed Matter, School of Science, Xi'an Jiaotong University, Xi'an, P. R. China, 710049

\*Email: [zhichengzhang@mail.xjtu.edu.cn](mailto:zhichengzhang@mail.xjtu.edu.cn)

## Result and Discussion

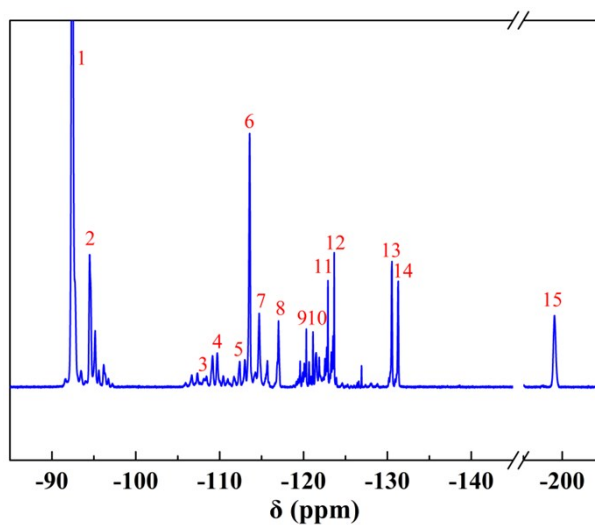

Fig. S1  $^{19}\text{F}$  NMR spectrum of the P(VDF-TrFE-CTFE) terpolymer.

Table S1 Chemical shifts and assignments of  $^{19}\text{F}$  NMR peaks of the P(VDF-TrFE-CTFE) terpolymer.

| Peak no. | Sequence                                                    | Chemistry shift (ppm) |
|----------|-------------------------------------------------------------|-----------------------|
| 1        | $-\text{CF}_2\text{CH}_2\text{CF}_2\text{CH}_2\text{CF}_2-$ | -92.4                 |
| 2        | $-\text{CH}_2\text{CH}_2\text{CF}_2\text{CH}_2\text{CF}_2-$ | -94.5 ~ -96.2         |
| 3        | $-\text{CF}_2\text{CFCICF}_2\text{CFCICF}_2-$               | -106.7 ~ -109.7       |
| 4        | $-\text{CF}_2\text{CH}_2\text{CF}_2\text{CF}_2\text{CFCl}-$ | -109.7                |
| 5        | $-\text{CF}_2\text{CFCICF}_2\text{CFCICH}_2-$               | -112.3 ~ -112.9       |
| 6        | $-\text{CF}_2\text{CH}_2\text{CF}_2\text{CF}_2\text{CFH}-$  | -113.0                |
| 7        | $-\text{CF}_2\text{CH}_2\text{CF}_2\text{CF}_2\text{CH}_2-$ | -114.7                |
| 8        | $-\text{CH}_2\text{CF}_2\text{CF}_2\text{CH}_2\text{CH}_2-$ | -117.0                |
| 9        | $-\text{CH}_2\text{CF}_2\text{CF}_2\text{CFCICH}_2-$        | -119.6 ~ -120.3       |
| 10       | $-\text{CF}_2\text{CF}_2\text{CFCICH}_2\text{CF}_2-$        | -121.1 ~ -121.8       |
| 11       | $-\text{CF}_2\text{CFHCF}_2\text{CFHCF}_2-$                 | -122.9                |
| 12       | $-\text{CF}_2\text{CFHCF}_2\text{CFHCH}_2-$                 | -123.6                |
| 13       | $-\text{CH}_2\text{CF}_2\text{CF}_2\text{CFHCH}_2-$         | -130.5                |
| 14       | $-\text{CF}_2\text{CFCICF}_2\text{CFHCH}_2-$                | -131.2                |
| 15       | $-\text{CH}_2\text{CF}_2\text{CFHCF}_2\text{CH}_2-$         | -199.0                |

Fig. S1 shows the  $^{19}\text{F}$  NMR spectrum of a P(VDF-TrFE-CTFE) terpolymer and the assignments of the peak are listed in Table S1.

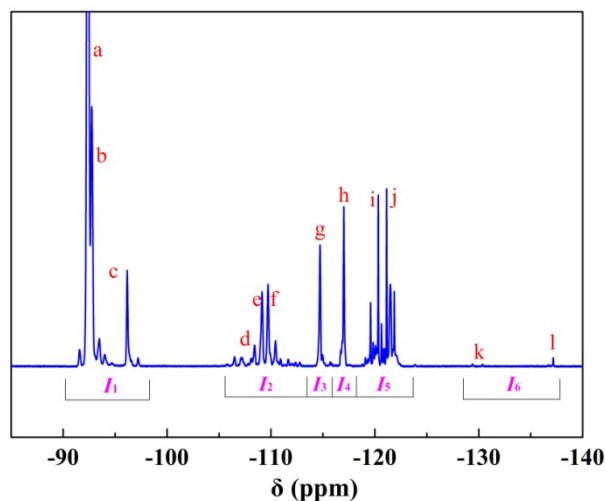

Fig. S2  $^{19}\text{F}$  NMR spectrum of the P(VDF-CTFE) copolymer (VDF/CTFE = 91.0/9.0).

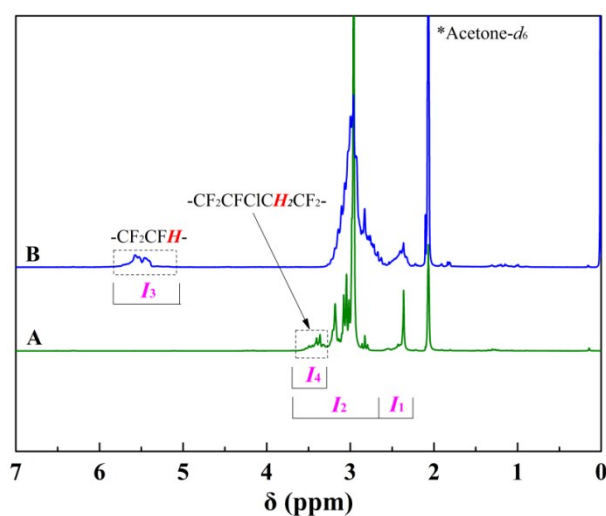

Fig. S3 (A) F-decoupled  $^1\text{H}$  NMR spectrum of a P(VDF-CTFE) (VDF/CTFE = 91.0/9.0) sample and (B)  $^1\text{H}$  NMR of its full hydrogenation product P(VDF-TrFE).

Fig. S2 shows the  $^{19}\text{F}$  NMR spectrum of a P(VDF-CTFE) copolymer. The molar ratio of main chain could be calculated by the equation,  $\text{VDF/CTFE} = 3(I_1 + I_2 + 3I_3 - I_4)/2[I_5 + I_6 + 2(I_4 - I_3)]$ , the chemical composition of P(VDF-CTFE) is calculated to be VDF/CTFE = 91.0/9.8 mol%. Fig. S3 shows the corresponding F-decoupled  $^1\text{H}$

NMR spectra of P(VDF-CTFE) and  $^1\text{H}$  NMR of its full hydrogenation product. From Fig. S3B, the peaks integral of  $I_1$ ,  $I_2$ ,  $I_3$  and the equation,  $\text{TrFE/VDF} = 2I_3/(I_1 + I_2)$ , the chemical composition of P(VDF-CTFE) is calculated to be VDF/CTFE = 91.0/9.0 mol%. From Fig. S3A, the peaks integral of  $I_1$ ,  $I_2$ ,  $I_4$  and the equation,  $\text{CTFE/VDF} = I_4/(I_1 + I_2)$ , the chemical composition of the same sample is calculated to be VDF/CTFE = 91.0/8.3 mol%, which is slightly smaller than the other two methods mentioned above. And the reason has been explained in the main text. The composition results calculated from both hydrogenation method and F-H decoupled method agree very well suggesting the accuracy of F-H decoupled  $^1\text{H}$  NMR.
